# Supplementary material
Source: publisher figshare collection journal article supplement (https://acs.figshare.com/ndownloader/files/4629382)

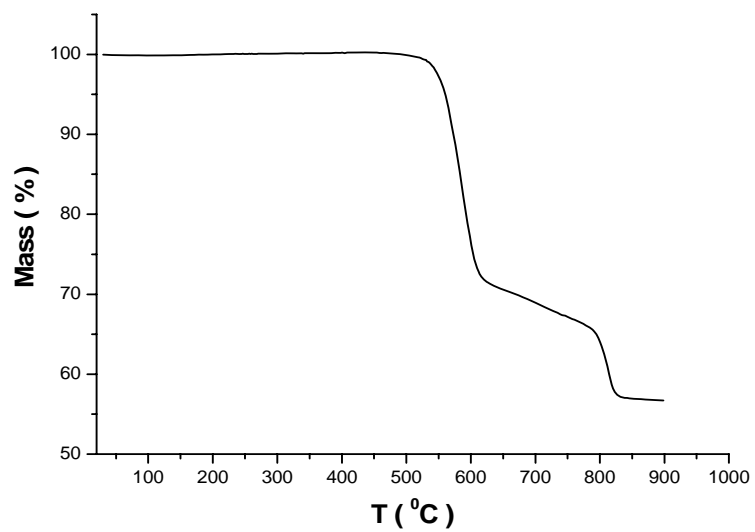

**Figure 1.** Thermogravimetric analysis for 1.

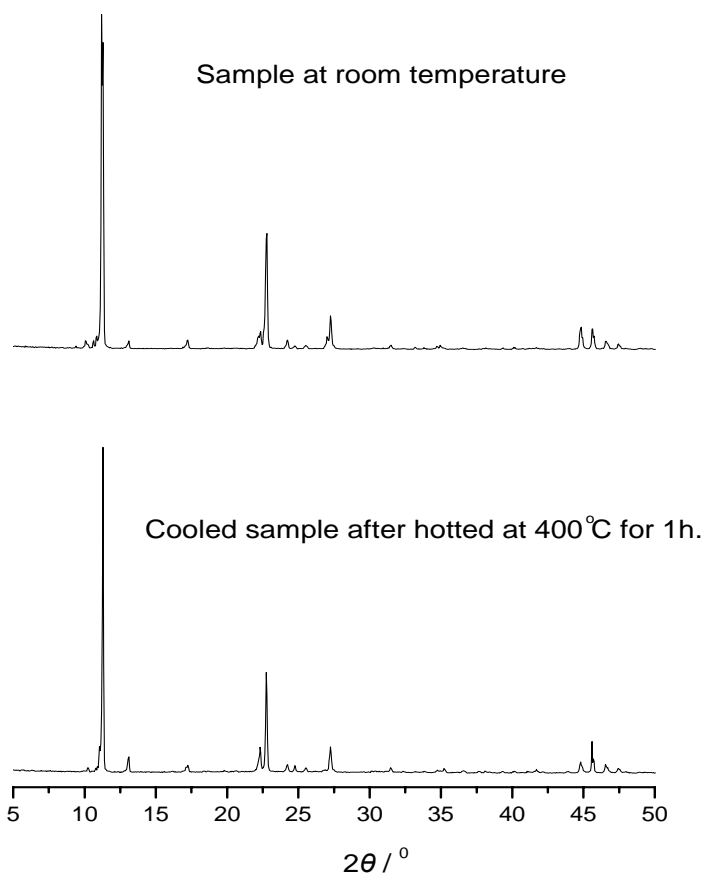

**Figure 2.** Comparison plots of powder X-ray pattern for 1.

Supplement: Supplementary file 1 [file 4629382]
